# Supplementary material
Source: PubMed Central journal article supplement (PMC3666684)
Supplement: 1221347110_pnas.201221347SI.pdf [file 1221347110_pnas.201221347SI.pdf]

# Supporting Information

Chen et al. 10.1073/pnas.1221347110

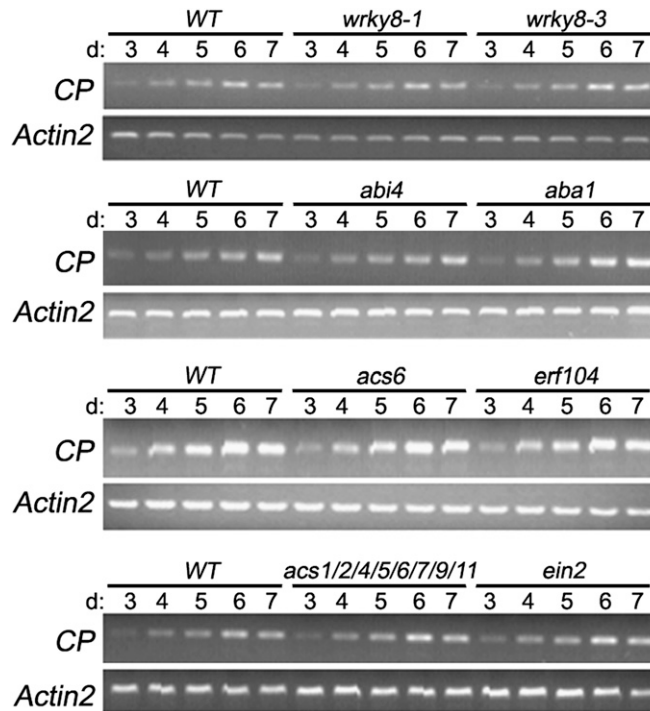

**Fig. S1.** Mutation of *wrky8*, *abi4*, *aba1*, *acs6*, *erf104*, *ein2*, or octuple *acs* mutant does not greatly affect the accumulation of crucifer-infecting tobacco mosaic virus (TMV-cg) in locally infected leaves. The third, fourth, and fifth true leaves of 26-d-old wild-type plants and related mutants were inoculated with TMV-cg (5  $\mu$ g/mL solution in 5 mM sodium phosphate, pH 7.5), and RNA samples were prepared from locally incubated leaves at 3, 4, 5, 6, and 7 d postinfection (dpi) with TMV-cg. RT-PCR was performed using TMV-cg coat protein (CP) primers, and the *Actin2* gene was used as an internal control for an equal volume of cDNA. Data presented are representative of results obtained from three replicate experiments.





**Table S1. Genes whose expression was enhanced by TMV-cg in *wrky8-1* compared with wild type 6 dpi**

| Transcript ID                                             | Annotation                                        | Fold change (log2) |
|-----------------------------------------------------------|---------------------------------------------------|--------------------|
| Transcription factors and signal transduction transcripts |                                                   |                    |
| At3g28210                                                 | Zinc finger protein (PMZ)                         | 6.1                |
| At1g74930                                                 | AP2 domain containing protein                     | 3.6                |
| At3g01830                                                 | Calmodulin-related protein                        | 3.2                |
| At5g39670                                                 | Calcium-binding protein                           | 2.9                |
| At2g46400                                                 | WRKY46                                            | 2.7                |
| At3g47400                                                 | Calcium-binding EF hand family protein            | 2.5                |
| At5g22380                                                 | NAC transcription factor                          | 2.4                |
| At3g44350                                                 | NAC transcription factor                          | 2.4                |
| At1g80840                                                 | WRKY40                                            | 2.4                |
| At4g04500                                                 | Receptor-like protein kinase                      | 2.3                |
| At5g59820                                                 | ZAT12                                             | 2.2                |
| At3g27420                                                 | Zinc finger (C3HC4-type RING finger)              | 2.1                |
| At4g23150                                                 | Serine/threonine kinase                           | 2.1                |
| At5g04340                                                 | Putative C2H2 zinc finger transcription factor    | 2.0                |
| At3g55980                                                 | Zinc-finger transcription factor (PE1)            | 1.9                |
| At4g04490                                                 | Putative receptor-like protein kinase             | 1.9                |
| At1g18570                                                 | Myb family transcription factor (MYB51)           | 1.9                |
| At1g76650                                                 | Putative calmodulin                               | 1.9                |
| At1g11340                                                 | Receptor kinase                                   | 1.8                |
| At3g59700                                                 | Serine/threonine-specific kinase lecPK1 precursor | 1.7                |
| At3g45860                                                 | Receptor-like protein kinase                      | 1.7                |
| At2g40140                                                 | Putative CCCH-type zinc finger protein            | 1.7                |
| At5g22890                                                 | C2H2 zinc finger protein                          | 1.6                |
| At5g26920                                                 | Calmodulin-binding protein                        | 1.5                |
| At1g66400                                                 | Calmodulin-related protein                        | 1.5                |
| At3g56400                                                 | WRKY70                                            | 1.4                |
| At4g18250                                                 | Receptor serine/threonine kinase                  | 1.4                |
| At4g11890                                                 | Protein kinase                                    | 1.4                |
| At2g38470                                                 | WRKY33                                            | 1.4                |
| At2g41410                                                 | Calmodulin-like protein                           | 1.3                |
| At5g67450                                                 | Cys2/His2-type zinc finger protein 1              | 1.3                |
| At5g01540                                                 | Receptor like protein kinase                      | 1.2                |
| At1g66880                                                 | Serine/threonine protein kinase                   | 1.2                |
| At3g25600                                                 | Calmodulin                                        | 1.2                |
| At1g76040                                                 | Calcium-dependent protein kinase                  | 1.2                |
| At2g43290                                                 | Putative calcium binding protein                  | 1.0                |
| At1g73805                                                 | Putative calmodulin-binding protein               | 1.0                |
| At1g22190                                                 | AP2 domain containing protein PAP2                | 1.0                |
| Pathogen- and stress-associated transcripts               |                                                   |                    |
| At2g14610                                                 | PR1                                               | 3.3                |
| At3g57260                                                 | PR2                                               | 2.2                |
| At1g28480                                                 | glutaredoxin                                      | 2.2                |
| At2g32140                                                 | Putative disease resistance protein               | 2.2                |
| At2g40000                                                 | Putative nematode-resistance protein              | 2.1                |
| At1g57630                                                 | Disease-resistance RPP1-WsB                       | 2.0                |
| At1g66090                                                 | Disease-resistance                                | 1.9                |
| At4g13900                                                 | Putative disease resistance protein Hcr9-9A       | 1.8                |
| At2g43570                                                 | Endochitinase isolog                              | 1.8                |
| At5g58120                                                 | Resistance protein                                | 1.6                |
| At3g25010                                                 | Disease-resistance protein                        | 1.6                |
| At2g32680                                                 | Putative disease resistance protein               | 1.5                |
| At1g72940                                                 | Disease-resistance protein                        | 1.4                |
| At2g34930                                                 | Putative disease resistance protein               | 1.4                |
| At1g75040                                                 | PR5                                               | 1.3                |
| At3g56710                                                 | SigA binding protein                              | 1.2                |
| At3g48090                                                 | Disease-resistance protein EDS1                   | 1.0                |
| Ethylene-associated transcripts                           |                                                   |                    |
| At4g11280                                                 | ACS6                                              | 2.5                |
| At4g34410                                                 | ERF/AP2 transcription factor                      | 1.9                |
| At5g61600                                                 | ERF104                                            | 1.8                |
| At4g17490                                                 | ERF6                                              | 1.6                |

**Table S1. Cont.**

| Transcript ID | Annotation                                         | Fold change (log2) |
|---------------|----------------------------------------------------|--------------------|
| At5g51190     | ERF/AP2 transcription factor                       | 1.6                |
| At2g44840     | Putative ethylene response element binding protein | 1.6                |
| At5g47230     | ERF5                                               | 1.5                |
| At4g08040     | ACS11                                              | 1.2                |
| At4g17500     | ERF-1                                              | 1.2                |
| At1g28370     | ERF11                                              | 1.2                |
| At5g47220     | ERF2                                               | 1.1                |
| At3g23240     | ERF1                                               | 1.0                |

**Table S2. Primer sequences**

| Promoter                                                                            | Primer                                  |
|-------------------------------------------------------------------------------------|-----------------------------------------|
| Primers used for quantitative RT-PCR (qRT-PCR) amplification of different promoters |                                         |
| ABI4-W1-1                                                                           | 5'-AACTTAGTGAGCAAAGCATTG-3'             |
| ABI4-W1-2                                                                           | 5'-CCAATCTCAATCATTACAG-3'               |
| ABI4-W2-1                                                                           | 5'-ATTTGTCTCTTAATTTCAATGGTATAAG-3'      |
| ABI4-W2-2                                                                           | 5'-GACCACAAATATAACAAATGG-3'             |
| ABI4-W3-1                                                                           | 5'-TAAGATTAATAAAAAGGTAGTATCCAAA-3'      |
| ABI4-W3-2                                                                           | 5'-TTCATTTAGTCCACTTAACACCA-3'           |
| ACS6-W1-1                                                                           | 5'-TGGTTCCTGATTCCTACTCTT-3'             |
| ACS6-W1-2                                                                           | 5'-CACGTGCTTTATATTATTGGTCTAAT-3'        |
| ACS6-W2,3-1                                                                         | 5'-AATAGACCGCTTTACAGAAG-3'              |
| ACS6-W2,3-2                                                                         | 5'-TAGTTAGTTACATGTGGGTGGTC-3'           |
| ACS6-W4,5-1                                                                         | 5'-ATACATGAACAAAGATAAGTATTAGTAGTACAC-3' |
| ACS6-W4,5-2                                                                         | 5'-TAGAATCAGTAATGTTGATAGTGGC-3'         |
| ACS6-W6-1                                                                           | 5'-GATGACCTAATTGGCCTGA-3'               |
| ACS6-W6-2                                                                           | 5'-GCTTTTCGTTATCCGTTCA-3'               |
| ACS6-W7-1                                                                           | 5'-GTACTCTCAGGTCCCCCA-3'                |
| ACS6-W7-2                                                                           | 5'-ATTACAACGAAAGTCCATGAA-3'             |
| ERF104-W1-1                                                                         | 5'-TGAATTTGGGAAAAGTCTAA-3'              |
| ERF104-W1-2                                                                         | 5'-TTAACTCGTTGGCACC-3'                  |
| ERF104-W2-1                                                                         | 5'-CTCTTATCCCACTTCCACA-3'               |
| ERF104-W2-2                                                                         | 5'-GAAATCGATGGCTAAAGCTT-3'              |
| Primers used for RT-PCR or qRT-PCR analysis of gene expression                      |                                         |
| WRKY8-1                                                                             | 5'-ATGATCTCTCCGTGTGCCA-3'               |
| WRKY8-2                                                                             | 5'-ATCATCAAGGCTCTGTTTGAAGA-3'           |
| ACS6-1                                                                              | 5'-GGAGGAGACTAAACCGATGGCTGC-3'          |
| ACS6-2:                                                                             | 5'-GGCACAGGCGAATGAGGCGA-3'              |
| ERF104-1                                                                            | 5'-AGCGGCGTTTCAATTACGTG-3'              |
| ERF104-2                                                                            | 5'-GGCGGAGAACCCTTATCTCG-3'              |
| ABI4-1                                                                              | 5'-GGGCAGGAACAAGGAGGAAG-3'              |
| ABI4-2                                                                              | 5'-TAACCCGGATCCAGACCCAT-3'              |
| ABA1-1                                                                              | 5'-CGAAGATGCATGCTCGTGTG-3'              |
| ABA1-2                                                                              | 5'-TGTCGACGATCTAAACCGC-3'               |
| ABA2-1                                                                              | 5'-ACTCGCTTTGGCTCATTGTC-3'              |
| ABA2-2                                                                              | 5'-ACAGAACAGCGTTCGCTACA-3'              |
| ABA3-1                                                                              | 5'-GGGGCTGCTGTATGTGTTCT-3'              |
| ABA3-2                                                                              | 5'-AAGCAAGCTTCTCCACCTCC-3'              |
| PR1-1                                                                               | 5'-GCAGCCTATGCTCGGAGCTAC-3'             |
| PR1-2                                                                               | 5'-TCCATTGCACGTGTTCCGAGC-3'             |
| TMV-CP-1                                                                            | 5'-GCGATTGTGACACCAAACCAGCG-3'           |
| TMV-CP-2                                                                            | 5'-TCGGAAGCCGATGGACGCGA-3'              |
| ACTIN2-1                                                                            | 5'-TGTGCCAATCTACGAGGGTTT-3'             |
| ACTIN2-2                                                                            | 5'-TTTCCCCTCTGCTGTTGT-3'                |
| Primers used for PCR amplifications for Northern blot analysis                      |                                         |
| PR2-1                                                                               | 5'-TCCCTTGCTGCTGAATCTCT-3'              |
| PR2-2                                                                               | 5'-TCGGTGATCCATTCTCACA-3'               |
| TMV-CP-3                                                                            | 5'-atgtcttacaacatcagagctcg-3'           |
| TMV-CP-4                                                                            | 5'-CTATGTAGCCGGAGCAGTAGTCC-3'           |

## Other Supporting Information Files

[Dataset S1 \(XLS\)](#)
